# Supplementary material for: Reticulate phylogeny of gastropod-shell-breeding cichlids from Lake Tanganyika – the result of repeated introgressive hybridization
Source: Springer Nature journal article supplement (doi:10.1186/1471-2148-7-7), 2007-01-25
Supplement: Additional file 8 [file 1471-2148-7-7-s8.doc]

**Additional File 8 -** Allele sizes (bp) at six microsatellite loci in four hybrid specimens collected at Wonzye and characterization of the genetic diversity in the parental species at the same locality, with allele size range, expected (He) and observed (Ho) heterozygosity.

|  |  | **Locus** | | | | | | | | | | | |
| --- | --- | --- | --- | --- | --- | --- | --- | --- | --- | --- | --- | --- | --- |
|  |  | **Pzeb3** | | **TmoM25** | | **TmoM27** | | **UNH154** | | **UNH855** | | **UNH952** | |
| Hybrid 1.1. |  | 313 | 319 | 361 | 361 | 372 | 384 | 90 | 100 | 149 | 151 | 135 | 159 |
| Hybrid 1.2 |  | 313 | 319 | 359 | 361 | 372 | 384 | 90 | 114 | 149 | 153 | 135 | 153 |
| Hybrid 2.1 |  | 309 | 311 | 353 | 367 | 370 | 382 | 88 | 114 | 149 | 153 | 135 | 161 |
| Hybrid 2.2 |  | 309 | 311 | 353 | 367 | 370 | 382 | 88 | 114 | 149 | 153 | 135 | 161 |
|  |  |  | |  | |  | |  | |  | |  | |
| *L. callipterus* (n=19) | range | 309-319 | | 351-361 | | 370-376 | | 88-104 | | 149 | | 151-159 | |
|  | He | 0.7645 | | 0.6814 | | 0.6219 | | 0.8504 | | 0.0000 | | 583102 | |
|  | Ho | 0.6842 | | 0.7368 | | 0.2105 | | 0.8421 | | 0.0000 | | 421053 | |
|  |  |  | |  | |  | |  | |  | |  | |
| *N. brevis/calliurus* (n=24) | range | 309-345 | | 343-371 | | 382-384 | | 94-126 | | 147-153 | | 131-135 | |
|  | He | 0.6059 | | 0.8620 | | 0.4783 | | 0.8924 | | 0.6102 | | 0.1918 | |
|  | Ho | 0.5833 | | 0.5833 | | 0.1250 | | 0.5833 | | 0.4167 | | 0.1250 | |
|  |  |  | |  | |  | |  | |  | |  | |
| *N. fasciatus* (n=21) | range | 311 | | 361-367 | | 370 | | 88-102 | | 149 | | 159-161 | |
|  | He | 0.0000 | | 0.0465 | | 0.0000 | | 0.5499 | | 0.0000 | | 0.0465 | |
|  | Ho | 0.0000 | | 0.0476 | | 0.0000 | | 0.4286 | | 0.0000 | | 0.0476 | |
